# Supplementary material for: Lung ventilation strategies for acute respiratory distress syndrome: a systematic review and network meta-analysis
Source: PubMed Central journal article supplement (PMC4783789; doi:10.1038/srep22855), 2016-03-09

# **Lung ventilation strategies for acute respiratory distress syndrome: a systematic review and network meta-analysis**

**Changsong Wang, Xiaoyang Wang, Chunjie Chi, Libo Guo, Lei Guo, Nana Zhao, Weiwei Wang, Xin Pi, Bo Sun, Ailing Lian, Jinghui Shi, Enyou Li**

## **Appendix 1. Search Strategy**

### **1. Search strategy for CENTRAL, The Cochrane Library**

- #1 MeSH descriptor: [Respiratory Distress Syndrome, Adult] explode all trees
- #2 acute lung injury:ti,ab,kw (Word variations have been searched)
- #3 Adult Respiratory Distress Syndrome:ti,ab,kw (Word variations have been searched)
- #4 Acute Respiratory Distress Syndrome:ti,ab,kw (Word variations have been searched)
- #5 ARDS or ALI:ti,ab,kw (Word variations have been searched)
- #6 #1 or #2 or #3 or #4 or #5
- #7 MeSH descriptor: [Respiration, Artificial] explode all trees
- #8 lung protective ventilation strategy:ti,ab,kw (Word variations have been searched)
- #9 protective near ventilation:ti,ab,kw (Word variations have been searched)
- #10 mechanical ventilation:ti,ab,kw (Word variations have been searched)
- #11 LPVS:ti,ab,kw (Word variations have been searched)
- #12 #7 or #8 or #9 or #10 or #11
- #13 #6 and #12

### **2. Search strategy for EMBASE (OvidSP)**

1. respiratory distress syndrome/ or respiratory distress/ or acute lung injury/ or adult respiratory distress syndrome/ or acute respiratory failure/ or adult respiratory distress syndrome.mp. or acute lung injury.mp. or acute respiratory distress syndrome.mp. or (ards or ali).mp.
2. respiration, artificial/ or lung protective ventilation strategy/ or (protective adj3 ventilation).mp. or mechanical ventilation.mp. or LPVS.mp. [mp=title, abstract, subject headings, heading word, drug trade name, original title, device manufacturer, drug manufacturer, device trade name, keyword]
3. 1 and 2
4. (placebo.sh. or controlled study.ab. or random\*.ti,ab. or trial\*.ti,ab. or ((singl\* or doubl\* or trebl\* or tripl\*) adj3 (blind\* or mask\*)).ti,ab.) not (animals not (humans and animals)).sh.
5. 3 and 4

### **3. Search strategy for MEDLINE (OvidSP)**

1. exp Respiratory Distress Syndrome, Adult/ or Adult Respiratory Distress Syndrome/ or Acute Lung Injury/ or Acute Respiratory Distress Syndrome/ or ARDS.mp. or ALI.mp.
2. exp Respiration, Artificial / or lung protective ventilation strategy / or (protective adj3 ventilation).mp. or mechanical ventilation or LPVS.mp.

3. 1 and 2

4. ((randomized controlled trial or controlled clinical trial).pt. or randomized.ab. or placebo.ab. or clinical trials as topic.sh. or randomly.ab. or trial.ti.) not (animals not (humans and animals)).sh.

5. 3 and 4

#### 4. Search strategy for CINAHL (EBSCOhost)

S1 ( (MH “Respiratory Distress Syndrome, Acute”) OR (MH “Respiratory Distress Syndrome”) OR (MH “Acute Lung Injury”) ) OR ( ARDS or ALI ) OR ( (Respiratory Distress Syndrome and (acute or adult)) )

S2 (MM “Respiration, Artificial”) OR TI (mechanical ventilation) OR TX lung protective ventilation strategy OR AB ( protective and ventilation ) OR TX LPVS

S3 S1 and S2

#### 5. Search strategy for ISIWeb of Science

#1 TS=(adult respiratory distress syndrome or acute respiratory distress syndrome or acute lung injury or ards or ali)

#2 TS=(artificial respiration) or TS=(mechanical ventilation) or TS=(protective SAME ventilation) or TS= LPVS

#3 TS=(random\* or placebo\* or multicenter\* or prospective) or TS=(trail\* SAME (clinical or controlled))

#4 #1 and #2 and #3

### Appendix 2. Summary of excluded articles

| Year | Authors      | Excluded Reasons      |
|------|--------------|-----------------------|
| 1979 | John A.      | Patients do not match |
| 1983 | Christian E. | No control group      |
| 1988 | ALAN H       | Data deficient        |
| 1988 | Gilbert C    | Data deficient        |
| 1989 | Schapera A   | Patients do not match |
| 1990 | JAMES M.     | Patients do not match |
| 1990 | ALAN H       | Data deficient        |
| 1992 | Esen F       | No relevant outcome   |
| 1993 | Mercat A     | No control group      |
| 1993 | Putensen C   | No control group      |
| 1993 | Gattinoni L  | No control group      |
| 1994 | Martin R     | No control group      |
| 1994 | Pappert D    | No control group      |
| 1994 | Puybasset L  | with Nitric oxide     |
| 1994 | Sydow M      | No control group      |
| 1994 | Brunet F     | No control group      |
| 1994 | Jounieaux V  | No relevant outcome   |
| 1995 | Wickerts CJ  | No control group      |
| 1995 | Puybasset L  | With Nitric oxide     |
| 1995 | Samama CM    | With Nitric oxide     |

|      |               |                                                                       |
|------|---------------|-----------------------------------------------------------------------|
| 1995 | Ambrosino N   | Study objective did not match ,Comparison of non-invasive ventilation |
| 1995 | Gentilello LM | Non-randomized trials                                                 |
| 1996 | Davis K Jr    | Crossover study.                                                      |
| 1996 | Walmrath D    | Study objective did not match                                         |
| 1996 | Pelosi P      | Study objective did not match                                         |
| 1996 | Thorens JB    | Non-randomized trials                                                 |
| 1996 | Wiswell TE    | Patients do not match                                                 |
| 1996 | Hirschl RB    | Case Report                                                           |
| 1996 | Fretschner R  | Study objective did not match                                         |
| 1996 | Kiiski R      | Patients do not match                                                 |
| 1996 | Cereda M      | Non-randomized trials                                                 |
| 1996 | Borelli M     | Non-randomized trials                                                 |
| 1996 | Lundin S      | with Nitric oxide                                                     |
| 1996 | Gerstmann DR  | Patients do not match                                                 |
| 1996 | Messinger G   | Non-randomized trials                                                 |
| 1997 | Tejeda M      | Non-randomized trials                                                 |
| 1997 | C-M LIM,      | Study objective did not match,                                        |
| 1997 | Mourgeon E    | With Nitric oxide                                                     |
| 1997 | Blanch L      | With Nitric oxide                                                     |
| 1997 | Lewandowski K | Non-randomized trials                                                 |
| 1997 | Fort P        | No control group                                                      |
| 1997 | Nava S        | Non-randomized trials,Patients do not match                           |
| 1997 | Mergoni M     | Non-randomized trials                                                 |
| 1997 | Troncy E      | With Nitric oxide                                                     |
| 1997 | Warters RD    | Non-randomized trials                                                 |
| 1997 | Mercat A      | No control group                                                      |
| 1997 | Jellinek H    | Non-randomized trials                                                 |
| 1997 | Artucio H     | No control group                                                      |
| 1997 | Kalfon P      | Non-randomized trials                                                 |
| 1997 | Blanch L      | No control group                                                      |
| 1997 | Carvalho CR   | part of eligible trial                                                |
| 1997 | Iotti GA      | No control group                                                      |
| 1998 | Alvarez A     | No control group                                                      |
| 1998 | Genoni M      | No control group                                                      |
| 1998 | Borelli M     | No control group                                                      |
| 1998 | Jolliet P     | Non-randomized trials                                                 |
| 1998 | Stewart TE    | Patients do not match                                                 |
| 1998 | Gore DC       | No control group                                                      |
| 1998 | Bersten AD    | Non-randomized trials                                                 |
| 1998 | Croce MA      | Non-randomized trials                                                 |
| 1998 | Hirschl RB    | No control group                                                      |

|      |                |                                                     |
|------|----------------|-----------------------------------------------------|
| 1998 | Cohendy R      | Case Report                                         |
| 1998 | Cohendy R      | Patients do not match                               |
| 1998 | Wood KA        | Patients do not match                               |
| 1999 | Guerin C       | Patients do not match,no control group              |
| 1999 | Martinez M     | No control group                                    |
| 1999 | Baigorri F     | No control group                                    |
| 1999 | Voggenreiter G | No control group                                    |
| 1999 | Cooper AB      | Long-term follow-up                                 |
| 1999 | Calderini E    | Study objective did not match                       |
| 1999 | Xirouhaki N    | No control group                                    |
| 1999 | Lapinsky SE    | No control group, Patients do not match             |
| 1999 | Putensen C     | Non-randomized trials                               |
| 2000 | Martin TJ      | Patients do not match                               |
| 2000 | Wiedemann HP   | Study objective did not match                       |
| 2000 | Confalonieri M | Communicate with the author                         |
| 2000 | Miro AM        | Non-randomized trials                               |
| 2000 | Okamoto K      | with Nitric oxide                                   |
| 2000 | Okamoto K      | No control group                                    |
| 2000 | Nakagawa NK    | Study objective did not match,Patients do not match |
| 2000 | Foti G         | No control group                                    |
| 2000 | Borelli M      | Factorial analysis                                  |
| 2000 | Kattwinkel J   | Patients do not match                               |
| 2000 | Kondili E      | No control group                                    |
| 2000 | Masip J        | Patients do not match                               |
| 2000 | Antonelli M    | Patients do not match                               |
| 2000 | Tripathi M     | Case Report                                         |
| 2000 | Luhr OR        | Patients do not match                               |
| 2000 | Hoffman LA     | No control group                                    |
| 2000 | Delclaux C     | Patients do not match                               |
| 2001 | Staudinger T   | with Nitric oxide                                   |
| 2001 | Burns D        | No control group                                    |
| 2001 | Papazian L     | Non-randomized trials, no control group             |
| 2001 | Rocco M        | No control group                                    |
| 2001 | Schmitt JM     | Non-randomized trials, no control group             |
| 2001 | Johannigman JA | No control group, with Nitric oxide                 |
| 2001 | Mehta S        | Non-randomized trials, no control group             |
| 2001 | Crotti S       | Non-randomized trials, no control group             |
| 2001 | Davis K Jr     | No control group                                    |
| 2001 | Chiumello D    | Patients do not match                               |
| 2001 | Hering R       | No control group                                    |
| 2001 | Conrad SA      | No relevant outcome                                 |

|      |                   |                                                                |
|------|-------------------|----------------------------------------------------------------|
| 2001 | De Robertis E     | No control group                                               |
| 2001 | Wrigge H          | Ungrouped, no relevant outcome                                 |
| 2001 | Staudinger T      | Patients do not match                                          |
| 2001 | McKinley BA       | Study objective did not match,                                 |
| 2001 | Huang CC          | Ungrouped, no control group                                    |
| 2001 | Eisner MD         | Secondary analysis of experimental ARDS Network                |
| 2001 | van der Voort PH  | Study objective did not match,                                 |
| 2001 | Mercat A          | No control group                                               |
| 2001 | Huang CC          | Non-randomized trials, no control group, Patients do not match |
| 2002 | Thys F            | Comparison of non-invasive ventilation                         |
| 2002 | Confalonieri M,   | Comparison of non-invasive ventilation                         |
| 2002 | Charles D.        | Patients do not match                                          |
| 2002 | Malhotra A        | Communicate with the author                                    |
| 2002 | Hering R          | No control group                                               |
| 2002 | Lee DL            | Non-randomized trials                                          |
| 2002 | Cam BV            | Patients do not match                                          |
| 2002 | Ward NS           | Ungrouped                                                      |
| 2002 | Prin S            | Non-randomized trials, no control group                        |
| 2002 | de Durante G      | Non-randomized trials, no control group                        |
| 2002 | Matejovic M       | Non-randomized trials, no control group                        |
| 2002 | Hering R          | No relevant outcome                                            |
| 2002 | Gregoretti C      | No relevant outcome                                            |
| 2002 | Da Conceição M    | No control group                                               |
| 2002 | Reper P           | No relevant outcome                                            |
| 2002 | Vieillard-Baron A | Non-randomized trials, no control group                        |
| 2002 | Richard JC        | crossover study                                                |
| 2002 | Blanc Q           | Non-randomized trials, no control group                        |
| 2002 | Da Conceição M    | No relevant outcome, no control group                          |
| 2002 | Pfeiffer B        | Ungrouped                                                      |
| 2002 | Vieillard-Baron A | Non-randomized trials                                          |
| 2002 | Tan PS            | with Nitric oxide                                              |
| 2003 | Mehta S           | with Nitric oxide                                              |
| 2003 | Kraincuk P        | No control group                                               |
| 2003 | Kuhlen R          | No relevant outcome                                            |
| 2003 | Park KJ           | with Nitric oxide                                              |
| 2003 | Varpula T         | No relevant outcome                                            |
| 2003 | Kwok H            | Study objective did not match,                                 |
| 2003 | Albaiceta GM      | No relevant outcome                                            |
| 2003 | Gerlach H         | with Nitric oxide                                              |
| 2003 | Lim CM            | No relevant outcome                                            |
| 2003 | Passam F          | No control group                                               |

|      |                   |                                         |
|------|-------------------|-----------------------------------------|
| 2003 | Edibam C          | No control group                        |
| 2003 | Brower RG         | Non-randomized trials, no control group |
| 2003 | Tugrul S          | No control group                        |
| 2003 | Prat G            | No control group                        |
| 2003 | Boyer A           | Study objective did not match,          |
| 2003 | Bugedo G          | No control group                        |
| 2003 | Dyhr T            | No control group                        |
| 2003 | Fernández-Vivas M | Comparison of non-invasive ventilation  |
| 2003 | Ferrer M          | Comparison of non-invasive ventilation  |
| 2003 | Cross AM          | Patients do not match                   |
| 2003 | Gainnier M        | No control group                        |
| 2003 | Easby J           | No control group                        |
| 2003 | Schelling G       | Study objective did not match,          |
| 2003 | Richard JC        | No control group                        |
| 2003 | Pelosi P          | No control group                        |
| 2003 | Mehta S           | No control group                        |
| 2003 | Schreiter D       | Case Report                             |
| 2004 | Inal-Ince D       | Study objective did not match,          |
| 2004 | Fernández MD      | No control group                        |
| 2004 | Bein T            | Secondary analysis                      |
| 2004 | Martínez-Pérez M  | No control group                        |
| 2004 | Guerin C          | No homogenization                       |
| 2004 | Corrado A         | Patients do not match                   |
| 2004 | Taylor RW         | With Nitric oxide                       |
| 2004 | Cuomo A           | Comparison of non-invasive ventilation  |
| 2004 | Oczenski W        | No relevant outcome                     |
| 2004 | Lam CF            | No relevant outcome                     |
| 2004 | Ge Y              | No relevant outcome                     |
| 2005 | Mascia L          | No relevant outcome                     |
| 2005 | Zhang NX          | No relevant outcome                     |
| 2005 | Ferguson ND       | No control group                        |
| 2005 | Papazian L        | No relevant outcome                     |
| 2005 | Gu Q              | Non-randomized trials, no control group |
| 2005 | YI Li             | No relevant outcome                     |
| 2005 | Albaiceta GM      | No control group                        |
| 2005 | Kahn JM           | No relevant outcome                     |
| 2005 | Patroniti N       | No relevant outcome, no control group   |
| 2005 | Honrubia T        | Comparison of non-invasive ventilation  |
| 2005 | L'Her E           | Crossover study                         |
| 2005 | Sudarsanam TD     | Study objective did not match,          |
| 2005 | Varelmann D       | Crossover study                         |

|      |                  |                                                    |
|------|------------------|----------------------------------------------------|
| 2005 | Oczenski W       | Non-randomized trials, no control group            |
| 2005 | Prebio M         | Study objective did not match, no relevant outcome |
| 2005 | Tugrul S         | Non-randomized trials, no control group            |
| 2005 | Kallet RH        | Crossover study                                    |
| 2006 | Wurz J           | Study objective did not match,                     |
| 2006 | Girgis K         | Non-randomized trials, no control group            |
| 2006 | Mancebo J        | Comparison of non-invasive ventilation             |
| 2006 | Schneider E      | Crossover study                                    |
| 2006 | Stahl CA         | No control group                                   |
| 2006 | M Reindl,        | No control group                                   |
| 2006 | Rossetti HB      | No control group                                   |
| 2006 | Chiumello D      | No control group                                   |
| 2006 | Kallet RH        | Non-randomized trials, no control group            |
| 2006 | Brander L        | Non-prospective study                              |
| 2006 | Roch A           | No control group                                   |
| 2006 | Lasocki S        | No control group                                   |
| 2006 | Galiatsou E      | No control group                                   |
| 2006 | Kallet RH        | Non-randomized trials, no control group            |
| 2006 | Kondili E        | No control group                                   |
| 2006 | Hinkson CR       | No control group, Study objective did not match,   |
| 2006 | Gregorette C     | Patients do not match                              |
| 2007 | Confalonieri M   | Non-randomized trials,                             |
| 2007 | Bhandari V       | Patients do not match                              |
| 2007 | Mentzelopoulos   | Crossover study.                                   |
| 2007 | Remick D         | Communicate with the author                        |
| 2007 | Villar J         | Ungrouped                                          |
| 2007 | Coimbra VR       | Patients do not match                              |
| 2007 | Grasso S         | No control group                                   |
| 2007 | Toublanc B       | Cross-over study                                   |
| 2007 | Talmor D         | Cohort study                                       |
| 2007 | Toth I           | No control group                                   |
| 2007 | McClintock DE    | Secondary analysis of experimental ARDS Network    |
| 2007 | Malhotra A       | Case Report                                        |
| 2007 | Galiatsou E      | Communicate with the author                        |
| 2007 | Yang LY          | Cross-over study                                   |
| 2008 | Colombo D        | No control group                                   |
| 2008 | Arnal JM         | Non-randomized trials, no control group            |
| 2008 | Owens RL         | No control group                                   |
| 2008 | Muellenbach R.M. | Communicate with the author                        |
| 2008 | Kacmarek RM      | Communicate with the author                        |
| 2008 | David M          | Study objective did not match,                     |

|      |                      |                                          |
|------|----------------------|------------------------------------------|
| 2008 | Chiumello D          | Study objective did not match,           |
| 2008 | Wolthuis EK          | Patients do not match                    |
| 2008 | Thalanany MM         | Non-randomized trials, no control group  |
| 2008 | Mireles-Cabodevila E | Mathematical model                       |
| 2008 | Demory D             | No control group                         |
| 2008 | Constantin JM        | Crossover study                          |
| 2009 | Koutsoukou A         | No relevant outcome                      |
| 2009 | Mekontso Dessap A    | No control group                         |
| 2009 | Darmon M             | No relevant outcome                      |
| 2009 | WANG Yan             | Comparison of non-invasive ventilation   |
| 2009 | Michelet P           | Comparison of non-invasive ventilation   |
| 2009 | Agarwal R            | Comparison of non-invasive ventilation   |
| 2009 | Fraticegli AT        | Study objective did not match,           |
| 2009 | Gupta V              | No relevant outcome                      |
| 2009 | Allardet-Servent J   | No relevant outcome                      |
| 2009 | Bein T               | Case Report                              |
| 2009 | Ling-ling Du         | Study objective did not match,           |
| 2009 | Lee D.L              | Non-randomized trials, no control group  |
| 2009 | Chung K              | Patients do not match                    |
| 2009 | Carteaux G           | No control group                         |
| 2009 | Cornejo R            | No control group                         |
| 2009 | Malachias S          | No relevant outcome                      |
| 2009 | Kokkoris S           | No control group                         |
| 2009 | Mercat A             | No relevant outcome                      |
| 2009 | Lowhagen K           | No control group                         |
| 2009 | Piacentini E         | Non-randomized trials, no control group  |
| 2009 | Wang ZY              | Study objective did not match,           |
| 2009 | Sulemanji D          | Lung model                               |
| 2009 | Badet M              | No control group                         |
| 2009 | Cooke CR             | Cost-effectiveness model                 |
| 2009 | Wu XY                | Data deficient                           |
| 2009 | Tripathi M           | Non-randomized trials, no control group  |
| 2009 | Romero CM            | Non-randomized trials, no control group  |
| 2009 | Allardet-Servent J   | No control group                         |
| 2010 | Maxwell RA           | Patients do not match                    |
| 2010 | Constantin JM        | Patients do not match                    |
| 2010 | Namendys-Silva SA    | Communicate with the author              |
| 2010 | Veelo DP             | Study objective did not match, Ungrouped |
| 2010 | Iotti GA             | Patients do not match                    |
| 2010 | Bajwa AA             | No control group, crossover study        |
| 2010 | Menadue C            | Patients do not match, crossover study   |



|      |                  |                                            |
|------|------------------|--------------------------------------------|
| 2010 | Crucean A.C      | Patients do not match, no control group    |
| 2010 | Mentzelopoulos   | Crossover study,                           |
| 2010 | Montes FR        | Study objective did not match,             |
| 2010 | Isgrò S          | No control group, crossover study          |
| 2010 | Iannuzzi M       | No relevant outcome                        |
| 2010 | Squadrone V      | Study objective did not match,             |
| 2010 | Kanoore Edul VS  | No control group                           |
| 2010 | Iguchi N         | Study objective did not match,             |
| 2010 | Fougères E       | No control group                           |
| 2010 | Briel M          | Meta analysis                              |
| 2010 | Chung KK         | Patients do not match                      |
| 2010 | Constantin JM    | No control group                           |
| 2010 | Terzi N          | No control group                           |
| 2010 | Schmidt M        | No control group                           |
| 2010 | Verzilli D       | Non-randomized trials, no relevant outcome |
| 2010 | Van de Louw A    | No control group                           |
| 2010 | Di Marco F       | Crossover study                            |
| 2010 | Papaioannou VE   | Patients do not match                      |
| 2010 | Patroniti N      | No control group                           |
| 2010 | Marraro GA       | Study objective did not match,             |
| 2010 | Boyer A          | Crossover study, Patients do not match     |
| 2010 | Pipelng MR       | Case Report                                |
| 2010 | Patel DS         | Patients do not match                      |
| 2010 | Carteaux G       | Study objective did not match,             |
| 2010 | Vaschetto R      | Patients do not match                      |
| 2010 | Arnal J.-M       | Crossover study                            |
| 2010 | Cebrian J        | Cross-sectional study                      |
| 2011 | Mauri T          | No control group                           |
| 2011 | MA Ling          | Non-randomized trials, no control group    |
| 2011 | Martin-Loeches I | Conference word                            |
| 2011 | El Fadl M.A      | No control group                           |
| 2011 | Mauri T          | Study objective did not match,             |
| 2011 | Rodriguez P.O.   | No control group                           |
| 2011 | Guervilly C      | No control group                           |
| 2011 | Lang J           | Patients do not match                      |
| 2011 | Sundaresan A     | Non-randomized trials, no control group    |
| 2011 | Mauri T          | No control group                           |
| 2011 | Nemer SN         | Study objective did not match,             |
| 2011 | Sztrymf B        | No control group                           |
| 2011 | Niwa T           | Study objective did not match,             |
| 2011 | Andrews PL       | Crossover study, no control group          |

|      |                            |                                            |
|------|----------------------------|--------------------------------------------|
| 2011 | Guo-hui Yang               | No relevant outcome                        |
| 2011 | Chen CW                    | Non-randomized trials, no control group    |
| 2011 | Ozsancak A                 | Study objective did not match,             |
| 2011 | Zhang XY                   | No control group                           |
| 2011 | Cammarota G                | No control group                           |
| 2011 | Funk GC                    | Patients do not match                      |
| 2011 | Bellani G                  | No control group                           |
| 2011 | Chiew YS                   | No control group                           |
| 2011 | Girault C                  | Patients do not match                      |
| 2011 | Nava S                     | Patients do not match                      |
| 2011 | Arnal JM                   | No control group                           |
| 2011 | Guinot PG                  | Study objective did not match,             |
| 2011 | Dellamonica J              | No control group                           |
| 2011 | Lowhagen K                 | Cross-over study                           |
| 2011 | Mentzelopoulos SD          | No control group                           |
| 2011 | Leloup G                   | Case Report                                |
| 2011 | Liu W.-L                   | No relevant outcome                        |
| 2012 | Piquilloud L               | No control group                           |
| 2012 | Mohamed M. Tawfeek         | Comparison of non-invasive ventilation     |
| 2012 | <a href="#">Carrillo A</a> | Comparison of non-invasive ventilation     |
| 2012 | Alkhuja S                  | Study objective did not match,             |
| 2012 | ART Investigators          | Protocol                                   |
| 2012 | <a href="#">Franchi F</a>  | No relevant outcome                        |
| 2012 | Patroniti N                | No control group                           |
| 2012 | Guervilly C                | No control group                           |
| 2012 | Arnal JM                   | No control group                           |
| 2012 | Needham CJ                 | Study objective did not match,             |
| 2012 | Forel JM                   | Study objective did not match,             |
| 2012 | Vrettou C.S                | Data deficient                             |
| 2012 | Mauri T                    | No control group                           |
| 2012 | Chiew Y.S                  | No control group                           |
| 2012 | Anjos CF                   | No control group                           |
| 2012 | Watkins TR                 | predictive model.                          |
| 2012 | Han SH                     | Not article or research                    |
| 2012 | Serpa Neto A               | META analysis                              |
| 2012 | Sharaf M.S                 | No relevant outcome                        |
| 2012 | Guérin C                   | Non-randomized trials,                     |
| 2012 | Lucangelo U                | Non-randomized trials, no control group    |
| 2012 | Grasso S                   | Non-randomized trials                      |
| 2012 | Porot V                    | Non-randomized trials, no relevant outcome |
| 2012 | Bonastre J                 | Study objective did not match,             |

|      |                  |                                           |
|------|------------------|-------------------------------------------|
| 2012 | Redondo Calvo FJ | Study objective did not match,            |
| 2012 | de Matos GF      | Non-randomized trials, no control group   |
| 2012 | Küstermann J     | Not article or research                   |
| 2012 | Smetkin AA       | Study objective did not match,            |
| 2012 | Katsiari M       | No control group                          |
| 2012 | Gama de Abreu M, | Editorial                                 |
| 2013 | Johnson RF Jr    | Case Report                               |
| 2013 | Blum JM          | Study objective did not match,            |
| 2013 | Kowalski S       | Study objective did not match,            |
| 2013 | Schmidt M        | No control group                          |
| 2013 | Natalini G       | No control group                          |
| 2013 | Zhang JC         | Study objective did not match,            |
| 2013 | Dellamonica J    | No control group                          |
| 2013 | Severgnini P     | Patients do not match                     |
| 2013 | Huang Y          | No control group                          |
| 2013 | Mauri T          | No control group                          |
| 2013 | Rodriquez PO     | No control group                          |
| 2013 | Schadler D       | No relevant outcome                       |
| 2013 | Nava S           | Patients do not match                     |
| 2013 | Mauri T          | Non-randomized trials, no control group   |
| 2013 | Rachmale S       | Communicate with the author               |
| 2013 | Retamal J        | No relevant outcome                       |
| 2013 | Boissier F       | Prevalence and prognosis of cor pulmonale |
| 2013 | Lh eritier G     | Study objective did not match,            |
| 2013 | Needham CJ       | Study objective did not match,            |
| 2013 | Vollman KM       | No control group                          |
| 2013 | Wang WX          | No relevant outcome                       |
| 2013 | Zhu GF           | Patients do not match                     |
| 2013 | Wallet F         | No control group                          |
| 2013 | Hoeper MM        | No control group, Non-randomized trials   |
| 2013 | Bertrand PM      | Crossover study.                          |
| 2013 | Pintado M.C      | Patients do not match                     |
| 2013 | James M.         | Patients do not match                     |
| 2013 | Demet S.         | Patients do not match                     |
| 2014 | Wang Xiuyan,     | Patients do not match                     |
| 2014 | Yang Jing,       | Non-randomized trials                     |
| 2014 | Jing Zhang       | Retrospective study                       |
| 2015 | Emily Fish       | Protocol                                  |
| 2015 | Yaseen M.        | Patients do not match                     |

### Appendix 3.

The all-cause mortality effect estimates from multiple treatment meta-analysis compared with direct and indirect estimates, based on back-calculated, and pair-wise meta-analyses. Direct and indirect estimates of effect and the corresponding Bayesian 'I<sup>2</sup>' for inconsistency were calculated. And the 'I<sup>2</sup>' from Pooled pair-wise meta-analysis for heterogeneity were also calculated.

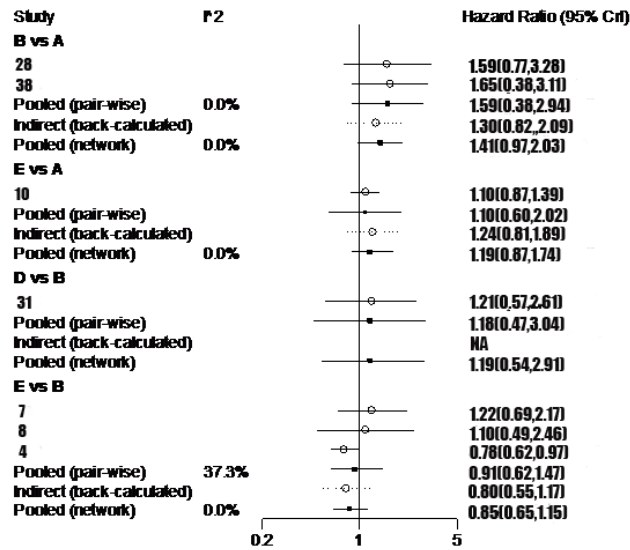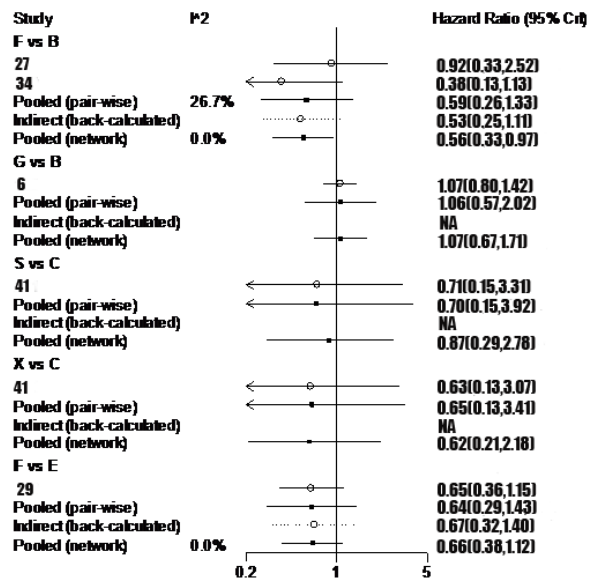

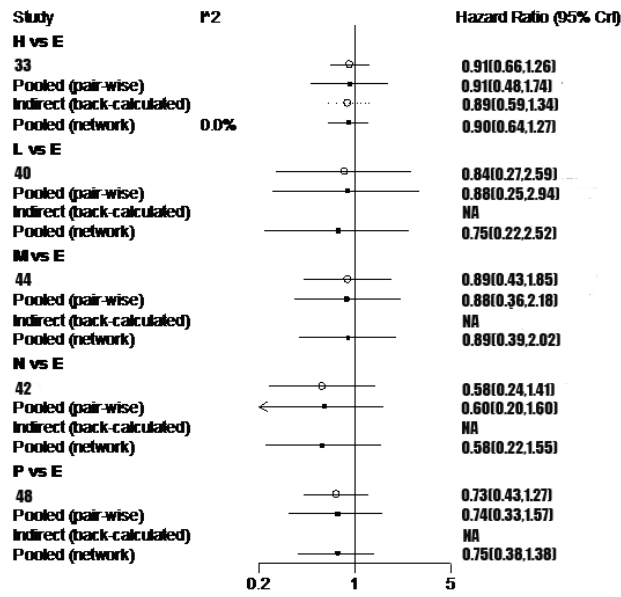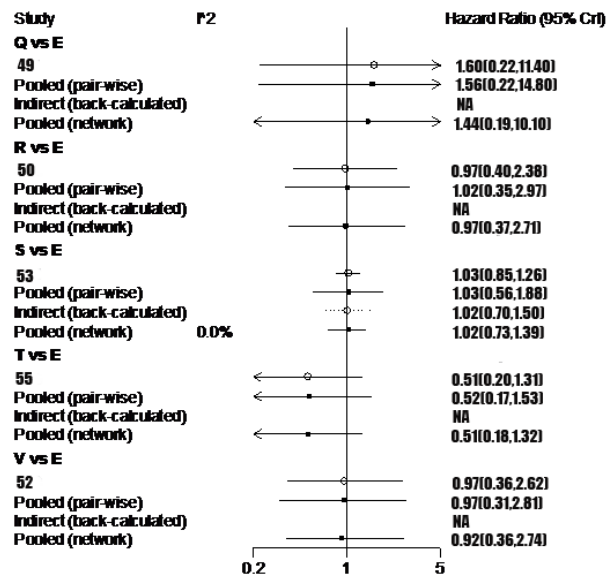

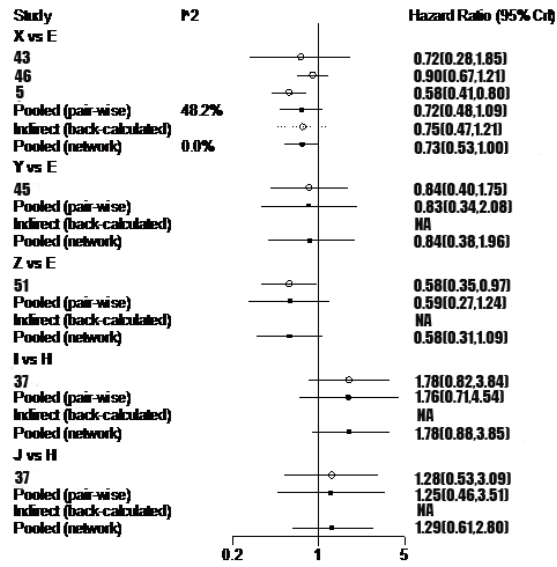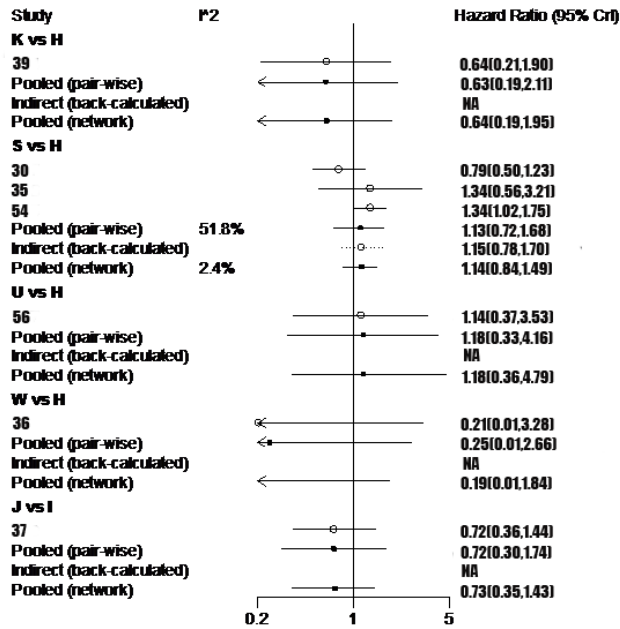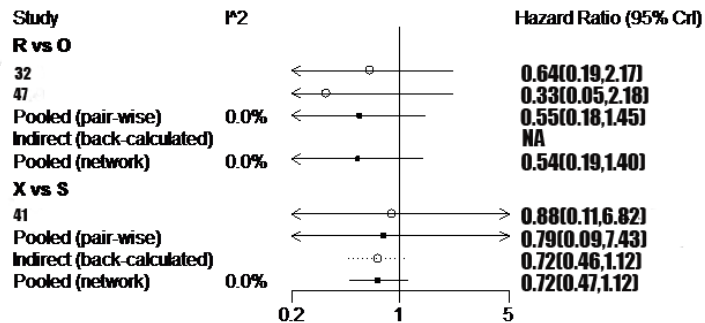

#### Appendix 4. Rankings based on simulations in terms of all-cause mortality.

The numbers in the table represent the probability that each treatment is best (rank 1), the second highest (rank 2), etc. Rank probabilities sum to 1, both within a rank over treatments and within a treatment over ranks. The numbers in bold text represent the highest likelihood of ranking for each particular treatment.

|   |           |           |           |           |           |           |
|---|-----------|-----------|-----------|-----------|-----------|-----------|
|   | [,1]      | [,2]      | [,3]      | [,4]      | [,5]      |           |
| A | 2.17E-05  | 1.78E-04  | 5.75E-04  | 1.45 E-03 | 3.26 E-03 |           |
| B | 3.57E-04  | 3.84E-03  | 1.53E-02  | 4.15 E-02 | 8.18 E-02 |           |
| C | 7.75E-02  | 9.41E-02  | 8.68E-02  | 7.64 E-02 | 6.47 E-02 |           |
| D | 8.48E-02  | 1.14E-01  | 1.12E-01  | 1.01 E-01 | 8.60 E-02 |           |
| E | 5.00E-06  | 1.83E-05  | 2.05E-04  | 1.04 E-03 | 4.00 E-03 |           |
| F | 2.50E-05  | 1.62E-04  | 4.87E-04  | 1.15E-03  | 2.00 E-03 |           |
| G | 1.29E-02  | 3.88E-02  | 7.25E-02  | 9.97 E-02 | 1.15 E-01 |           |
| H | 3.33E-06  | 6.67E-05  | 4.22E-04  | 1.70E-03  | 4.71 E-03 |           |
| I | 1.04E-01  | 1.59E-01  | 1.58E-01  | 1.28E-01  | 9.79 E-02 |           |
| J | 1.43E-02  | 4.56E-02  | 7.34E-02  | 8.50 E-02 | 8.33 E-02 |           |
| K | 6.14E-03  | 1.28E-02  | 1.46E-02  | 1.74 E-02 | 1.82 E-02 |           |
| L | 2.84E-02  | 4.33E-02  | 4.31E-02  | 4.30 E-02 | 4.21 E-02 |           |
| M | 7.73E-03  | 1.87E-02  | 2.93E-02  | 3.65 E-02 | 4.16 E-02 |           |
| N | 1.58E-03  | 3.97E-03  | 6.67E-03  | 9.42 E-03 | 1.14 E-02 |           |
| O | 2.60E-01  | 1.65E-01  | 9.62E-02  | 6.97 E-02 | 5.34 E-02 |           |
| P | 8.42E-04  | 2.66E-03  | 5.61E-03  | 9.40 E-03 | 1.31 E-02 |           |
| Q | 2.92E-01  | 1.06E-01  | 6.65E-02  | 4.88 E-02 | 3.83 E-02 |           |
| R | 5.10E-03  | 4.16E-02  | 5.50E-02  | 5.73 E-02 | 5.71 E-02 |           |
| S | 1.35E-04  | 9.73E-04  | 3.61E-03  | 1.05E-02  | 2.28 E-02 |           |
| T | 1.15E-03  | 2.44E-03  | 4.14E-03  | 6.12 E-03 | 7.27 E-03 |           |
| U | 5.70E-02  | 7.34E-02  | 6.73E-02  | 6.06 E-02 | 5.37 E-02 |           |
| V | 2.93E-02  | 4.64E-02  | 5.32E-02  | 5.35 E-02 | 5.17 E-02 |           |
| W | 1.04E-02  | 1.08E-02  | 9.89E-03  | 9.17 E-03 | 8.73 E-03 |           |
| X | 3.33E-06  | 3.83E-05  | 9.33E-05  | 2.73 E-04 | 5.67 E-04 |           |
| Y | 5.93E-03  | 1.52E-02  | 2.38E-02  | 3.02 E-02 | 3.50 E-02 |           |
| Z | 1.13E-04  | 4.35E-04  | 9.82E-04  | 1.67 E-03 | 2.62E-03  |           |
|   | [,6]      | [,7]      | [,8]      | [,9]      | [,10]     | [,11]     |
| A | 6.64 E-03 | 1.12 E-02 | 1.81 E-02 | 2.65 E-02 | 3.74 E-02 | 4.97E-02  |
| B | 1.22 E-01 | 1.47 E-01 | 1.50E-01  | 1.28 E-01 | 9.92 E-02 | 6.98 E-02 |
| C | 5.60 E-02 | 4.63 E-02 | 4.07 E-02 | 3.55 E-02 | 3.10 E-02 | 2.83E-02  |
| D | 7.09 E-02 | 5.90 E-02 | 4.83 E-02 | 3.99E-02  | 3.40E-02  | 2.94 E-02 |
| E | 1.12 E-02 | 2.82E-02  | 5.84E-02  | 1.00 E-01 | 1.39 E-01 | 1.67 E-01 |
| F | 3.42 E-03 | 5.28 E-03 | 7.19 E-03 | 9.97 E-03 | 1.28 E-02 | 1.66 E-02 |
| G | 1.13 E-01 | 1.04 E-01 | 8.79 E-02 | 7.01 E-02 | 5.53 E-02 | 4.44 E-02 |

|   |           |           |           |           |           |           |
|---|-----------|-----------|-----------|-----------|-----------|-----------|
| H | 1.01E-02  | 1.78 E-02 | 2.89 E-02 | 4.13 E-02 | 5.71E-02  | 7.35E-02  |
| I | 7.39 E-02 | 5.40E-02  | 4.18 E-02 | 3.33E-02  | 2.57 E-02 | 2.13 E-02 |
| J | 7.66 E-02 | 6.70E-02  | 5.82 E-02 | 5.10 E-02 | 4.54E-02  | 4.09 E-02 |
| K | 1.90 E-02 | 1.90 E-02 | 1.84 E-02 | 1.89 E-02 | 1.84 E-02 | 1.83 E-02 |
| L | 4.04 E-02 | 3.70 E-02 | 3.34 E-02 | 3.09 E-02 | 2.82 E-02 | 2.67E-02  |
| M | 4.49 E-02 | 4.49 E-02 | 4.29 E-02 | 4.18E-02  | 4.00E-02  | 3.98 E-02 |
| N | 1.34 E-02 | 1.49 E-02 | 1.54E-02  | 1.55 E-02 | 1.66 E-02 | 1.74 E-02 |
| O | 4.03 E-02 | 3.31 E-02 | 2.66 E-02 | 2.27E-02  | 1.97 E-02 | 1.73E-02  |
| P | 1.69 E-02 | 1.97 E-02 | 2.31 E-02 | 2.52 E-02 | 2.75 E-02 | 3.05 E-02 |
| Q | 3.12 E-02 | 2.69 E-02 | 2.35 E-02 | 2.03 E-02 | 1.71 E-02 | 1.54 E-02 |
| R | 5.29 E-02 | 4.96E-02  | 4.49E-02  | 4.19 E-02 | 3.74 E-02 | 3.55 E-02 |
| S | 4.11 E-02 | 6.46 E-02 | 8.84 E-02 | 1.07 E-01 | 1.21 E-01 | 1.18E-02  |
| T | 8.63 E-03 | 9.98E-03  | 1.08 E-02 | 1.13 E-02 | 1.22 E-02 | 1.28 E-02 |
| U | 4.87 E-02 | 4.18 E-02 | 3.71 E-02 | 3.35 E-02 | 2.98 E-02 | 2.81 E-02 |
| V | 4.86 E-02 | 4.51 E-02 | 3.97 E-02 | 3.72 E-02 | 3.40 E-02 | 3.20 E-02 |
| W | 8.55 E-03 | 7.91 E-03 | 7.32 E-03 | 7.29 E-03 | 6.20E-03  | 6.55 E-03 |
| X | 1.19 E-03 | 2.19 E-03 | 3.43E-03  | 5.56 E-03 | 8.66 E-03 | 1.33 E-02 |
| Y | 3.71 E-02 | 3.89 E-02 | 3.92 E-02 | 3.77 E-02 | 3.71E-02  | 3.74 E-02 |
| Z | 3.59E-03  | 4.80 E-03 | 5.87 E-03 | 7.21 E-03 | 8.80 E-03 | 1.03 E-02 |

|   |          |          |          |          |          |          |
|---|----------|----------|----------|----------|----------|----------|
|   | [,12]    | [,13]    | [,14]    | [,15]    | [,16]    | [,17]    |
| A | 6.43E-02 | 8.00E-02 | 9.54E-02 | 1.07E-01 | 1.09E-01 | 1.04E-01 |
| B | 4.81E-02 | 3.41E-02 | 2.35E-02 | 1.54E-02 | 9.44E-03 | 5.33E-03 |
| C | 2.64E-02 | 2.55E-02 | 2.62E-02 | 2.68E-02 | 2.68E-02 | 2.67E-02 |
| D | 2.66E-02 | 2.51E-02 | 2.39E-02 | 2.26E-02 | 2.15E-02 | 1.91E-02 |
| E | 1.65E-01 | 1.37E-01 | 9.40E-02 | 5.42E-02 | 2.60E-02 | 1.05E-02 |
| F | 2.09E-02 | 2.70E-02 | 3.48E-02 | 4.42E-02 | 5.51E-02 | 6.81E-02 |
| G | 3.66E-02 | 3.04E-02 | 2.61E-02 | 2.23E-02 | 1.84E-02 | 1.45E-02 |
| H | 9.19E-02 | 1.08E-01 | 1.18E-01 | 1.18E-01 | 1.04E-01 | 8.21E-02 |
| I | 1.84E-02 | 1.59E-02 | 1.39E-02 | 1.20E-02 | 9.99E-03 | 8.06E-03 |
| J | 3.82E-02 | 3.71E-02 | 3.58E-02 | 3.53E-02 | 3.37E-02 | 3.15E-02 |
| K | 1.91E-02 | 2.03E-02 | 2.28E-02 | 2.56E-02 | 2.88E-02 | 3.21E-02 |
| L | 2.68E-02 | 2.80E-02 | 3.02E-02 | 3.24E-02 | 3.41E-02 | 3.70E-02 |
| M | 4.05E-02 | 4.21E-02 | 4.52E-02 | 4.64E-02 | 4.78E-02 | 4.87E-02 |
| N | 1.85E-02 | 2.05E-02 | 2.46E-02 | 2.76E-02 | 3.14E-02 | 3.60E-02 |
| O | 1.63E-02 | 1.59E-02 | 1.60E-02 | 1.61E-02 | 1.56E-02 | 1.48E-02 |
| P | 3.40E-02 | 3.87E-02 | 4.51E-02 | 5.20E-02 | 5.84E-02 | 6.48E-02 |
| Q | 1.49E-02 | 1.49E-02 | 1.55E-02 | 1.68E-02 | 1.64E-02 | 1.71E-02 |
| R | 3.41E-02 | 3.50E-02 | 3.60E-02 | 3.74E-02 | 3.94E-02 | 4.01E-02 |
| S | 1.09E-01 | 9.37E-02 | 7.41E-02 | 5.35E-02 | 3.70E-02 | 2.33E-02 |
| T | 1.42E-02 | 1.69E-02 | 1.92E-02 | 2.19E-02 | 2.58E-02 | 2.95E-02 |



|   |          |          |          |          |          |          |
|---|----------|----------|----------|----------|----------|----------|
| U | 2.71E-02 | 2.74E-02 | 2.86E-02 | 2.93E-02 | 3.02E-02 | 3.10E-02 |
| V | 3.15E-02 | 3.19E-02 | 3.37E-02 | 3.53E-02 | 3.59E-02 | 3.68E-02 |
| W | 6.32E-03 | 6.69E-03 | 7.17E-03 | 8.06E-03 | 8.96E-03 | 9.79E-03 |
| X | 2.05E-02 | 3.15E-02 | 4.67E-02 | 6.76E-02 | 9.29E-02 | 1.16E-01 |
| Y | 3.77E-02 | 3.89E-02 | 4.20E-02 | 4.52E-02 | 4.91E-02 | 5.05E-02 |
| Z | 1.32E-02 | 1.66E-02 | 2.15E-02 | 2.65E-02 | 3.37E-02 | 4.25E-02 |

|   | [,18]    | [,19]    | [,20]    | [,21]    | [,22]    |
|---|----------|----------|----------|----------|----------|
| A | 8.98E-02 | 7.07E-02 | 5.30E-02 | 3.41E-02 | 2.04E-02 |
| B | 2.98E-03 | 1.45E-03 | 6.10E-04 | 2.63E-04 | 8.83E-05 |
| C | 2.67E-02 | 2.58E-02 | 2.61E-02 | 2.53E-02 | 2.62E-02 |
| D | 1.70E-02 | 1.53E-02 | 1.33E-02 | 1.18E-02 | 9.54E-03 |
| E | 2.91E-03 | 7.35E-04 | 1.42E-04 | 1.83E-05 | 6.67E-06 |
| F | 8.11E-02 | 9.37E-02 | 1.04E-01 | 1.11E-01 | 1.07E-01 |
| G | 1.15E-02 | 8.72E-03 | 6.20E-03 | 4.57E-03 | 3.17E-03 |
| H | 5.91E-02 | 3.86E-02 | 2.30E-02 | 1.21E-02 | 5.45E-03 |
| I | 6.40E-03 | 5.61E-03 | 4.03E-03 | 3.19E-03 | 2.55E-03 |
| J | 2.96E-02 | 2.66E-02 | 2.39E-02 | 2.05E-02 | 1.77E-02 |
| K | 3.54E-02 | 3.99E-02 | 4.59E-02 | 5.42E-02 | 6.61E-02 |
| L | 3.73E-02 | 4.01E-02 | 4.21E-02 | 4.58E-02 | 5.00E-02 |
| M | 5.01E-02 | 5.00E-02 | 4.97E-02 | 4.78E-02 | 4.54E-02 |
| N | 4.08E-02 | 4.76E-02 | 5.64E-02 | 6.73E-02 | 8.03E-02 |
| O | 1.42E-02 | 1.34E-02 | 1.33E-02 | 1.26E-02 | 1.25E-02 |
| P | 6.96E-02 | 7.61E-02 | 7.91E-02 | 7.87E-02 | 7.46E-02 |
| Q | 1.74E-02 | 1.84E-02 | 1.86E-02 | 2.07E-02 | 2.25E-02 |
| R | 4.02E-02 | 3.95E-02 | 4.18E-02 | 4.07E-02 | 3.94E-02 |
| S | 1.41E-02 | 7.96E-03 | 4.63E-03 | 2.33E-03 | 1.09E-03 |
| T | 3.52E-02 | 4.15E-02 | 5.01E-02 | 6.13E-02 | 7.89E-02 |
| U | 3.11E-02 | 3.20E-02 | 3.47E-02 | 3.48E-02 | 3.71E-02 |
| V | 3.76E-02 | 3.85E-02 | 3.93E-02 | 4.12E-02 | 4.10E-02 |
| W | 1.08E-02 | 1.24E-02 | 1.49E-02 | 1.78E-02 | 2.26E-02 |
| X | 1.34E-01 | 1.35E-01 | 1.19E-01 | 9.30E-02 | 5.98E-02 |
| Y | 5.24E-02 | 5.35E-02 | 5.32E-02 | 5.54E-02 | 5.47E-02 |
| Z | 5.33E-02 | 6.66E-02 | 8.37E-02 | 1.04E-01 | 1.22E-01 |

|   | [,23]    | [,24]    | [,25]    | [,26]    |
|---|----------|----------|----------|----------|
| A | 1.09E-02 | 4.54E-03 | 1.55E-03 | 2.30E-04 |
| B | 3.33E-05 | 1.17E-05 | 1.67E-06 | 0.00E+00 |
| C | 2.47E-02 | 2.21E-02 | 1.98E-02 | 7.74E-03 |
| D | 6.67E-03 | 4.64E-03 | 2.60E-03 | 6.98E-04 |
| E | 0.00E+00 | 0.00E+00 | 0.00E+00 | 0.00E+00 |
| F | 9.20E-02 | 6.45E-02 | 3.12E-02 | 6.76E-03 |

|   |          |          |          |          |
|---|----------|----------|----------|----------|
| G | 2.06E-03 | 1.25E-03 | 6.03E-04 | 1.63E-04 |
| H | 2.10E-03 | 5.88E-04 | 8.00E-05 | 3.33E-06 |
| I | 1.53E-03 | 8.55E-04 | 3.90E-04 | 6.50E-05 |
| J | 1.36E-02 | 9.65E-03 | 4.96E-03 | 9.67E-04 |
| K | 8.47E-02 | 1.11E-01 | 1.55E-01 | 7.82E-02 |
| L | 5.58E-02 | 5.70E-02 | 5.88E-02 | 2.83E-02 |
| M | 3.93E-02 | 3.21E-02 | 2.08E-02 | 5.97E-03 |
| N | 9.82E-02 | 1.22E-01 | 1.41E-01 | 6.11E-02 |
| O | 1.20E-02 | 1.08E-02 | 9.07E-03 | 3.65E-03 |
| P | 6.63E-02 | 5.02E-02 | 3.03E-02 | 7.68E-03 |
| Q | 2.55E-02 | 3.09E-02 | 4.20E-02 | 2.21E-02 |
| R | 3.84E-02 | 3.19E-02 | 2.10E-02 | 6.76E-03 |
| S | 3.97E-04 | 1.32E-04 | 2.17E-05 | 0.00E+00 |
| T | 1.01E-01 | 1.37E-01 | 1.84E-01 | 9.65E-02 |
| U | 3.81E-02 | 4.01E-02 | 3.51E-02 | 1.26E-02 |
| V | 4.15E-02 | 4.18E-02 | 3.28E-02 | 1.05E-02 |
| W | 3.03E-02 | 4.61E-02 | 8.91E-02 | 6.16E-01 |
| X | 3.19E-02 | 1.33E-02 | 3.47E-03 | 3.72E-04 |
| Y | 5.13E-02 | 4.22E-02 | 2.85E-02 | 7.92E-03 |
| Z | 1.31E-01 | 1.25E-01 | 8.81E-02 | 2.54E-02 |

**Appendix 5. Rankings based on simulations in terms of the incidence of barotraumas .**

The numbers in the table represent the probability that each treatment is best (rank 1), the second highest (rank 2), etc. Rank probabilities sum to 1, both within a rank over treatments and within a treatment over ranks. The numbers in bold text represent the highest likelihood of ranking for each particular treatment.

|   | [,1]     | [,2]     | [,3]     | [,4]     | [,5]     | [,6]     |
|---|----------|----------|----------|----------|----------|----------|
| A | 1.36E-03 | 4.49E-03 | 1.02E-02 | 1.92E-02 | 3.14E-02 | 4.60E-02 |
| B | 1.36E-02 | 5.19E-02 | 1.04E-01 | 1.57E-01 | 1.77E-01 | 1.64E-01 |
| D | 1.01E-01 | 1.23E-01 | 1.40E-01 | 1.26E-01 | 9.71E-02 | 7.74E-02 |
| E | 3.17E-04 | 2.42E-03 | 9.01E-03 | 2.61E-02 | 5.85E-02 | 1.07E-01 |
| F | 2.83E-03 | 7.93E-03 | 1.66E-02 | 2.71E-02 | 3.91E-02 | 5.04E-02 |
| H | 1.42E-03 | 8.11E-03 | 4.16E-02 | 8.98E-02 | 1.14E-01 | 1.18E-01 |
| I | 1.15E-01 | 2.63E-01 | 1.98E-01 | 1.07E-01 | 6.80E-02 | 4.81E-02 |
| J | 3.08E-01 | 2.92E-01 | 1.45E-01 | 7.25E-02 | 4.36E-02 | 3.03E-02 |
| K | 4.72E-04 | 7.12E-04 | 1.14E-03 | 1.27E-03 | 1.72E-03 | 1.51E-03 |
| L | 1.03E-01 | 8.84E-02 | 7.96E-02 | 6.62E-02 | 5.24E-02 | 4.60E-02 |
| N | 2.74E-01 | 1.19E-02 | 9.66E-03 | 6.18E-03 | 4.71E-03 | 3.94E-03 |

|   |          |          |          |          |          |          |
|---|----------|----------|----------|----------|----------|----------|
| S | 1.02E-02 | 2.86E-02 | 7.72E-02 | 1.06E-01 | 1.08E-01 | 9.86E-02 |
| T | 3.35E-02 | 5.45E-02 | 7.51E-02 | 8.33E-02 | 8.25E-02 | 7.84E-02 |
| X | 9.53E-03 | 2.22E-02 | 3.92E-02 | 5.48E-02 | 6.59E-02 | 7.36E-02 |
| Y | 2.58E-02 | 4.07E-02 | 5.36E-02 | 5.79E-02 | 5.69E-02 | 5.67E-02 |

|   |          |          |          |          |          |          |
|---|----------|----------|----------|----------|----------|----------|
|   | [,7]     | [,8]     | [,9]     | [,10]    | [,11]    | [,12]    |
| A | 6.14E-02 | 8.01E-02 | 1.04E-01 | 1.36E-01 | 1.67E-01 | 1.73E-01 |
| B | 1.32E-01 | 9.22E-02 | 5.70E-02 | 3.16E-02 | 1.45E-02 | 4.81E-03 |
| D | 6.37E-02 | 5.33E-02 | 4.89E-02 | 4.72E-02 | 4.40E-02 | 3.83E-02 |
| E | 1.63E-01 | 2.02E-01 | 1.97E-01 | 1.41E-01 | 6.84E-02 | 2.18E-02 |
| F | 6.12E-02 | 7.31E-02 | 8.76E-02 | 1.11E-01 | 1.40E-01 | 1.68E-01 |
| H | 1.15E-01 | 1.07E-01 | 1.03E-01 | 1.01E-01 | 9.04E-02 | 6.86E-02 |
| I | 3.79E-02 | 3.24E-02 | 3.00E-02 | 2.78E-02 | 2.53E-02 | 2.23E-02 |
| J | 2.30E-02 | 1.99E-02 | 1.80E-02 | 1.55E-02 | 1.22E-02 | 9.80E-03 |
| K | 1.53E-03 | 1.69E-03 | 1.81E-03 | 2.32E-03 | 3.13E-03 | 4.89E-03 |
| L | 4.16E-02 | 4.09E-02 | 4.15E-02 | 4.69E-02 | 5.73E-02 | 7.59E-02 |
| N | 3.32E-03 | 3.23E-03 | 3.38E-03 | 3.86E-03 | 4.77E-03 | 6.33E-03 |
| S | 8.82E-02 | 8.15E-02 | 7.94E-02 | 8.08E-02 | 8.07E-02 | 7.61E-02 |
| T | 7.38E-02 | 7.10E-02 | 7.26E-02 | 7.79E-02 | 8.63E-02 | 9.16E-02 |
| X | 7.96E-02 | 8.44E-02 | 9.40E-02 | 1.05E-01 | 1.15E-01 | 1.18E-01 |
| Y | 5.61E-02 | 5.72E-02 | 6.17E-02 | 7.34E-02 | 9.01E-02 | 1.21E-01 |

|   |          |          |          |
|---|----------|----------|----------|
|   | [,13]    | [,14]    | [,15]    |
| A | 1.27E-01 | 3.83E-02 | 1.06E-03 |
| B | 1.00E-03 | 9.67E-05 | 0.00E+00 |
| D | 2.98E-02 | 1.03E-02 | 4.25E-04 |
| E | 4.17E-03 | 3.48E-04 | 3.33E-06 |
| F | 1.59E-01 | 5.44E-02 | 1.84E-03 |
| H | 3.46E-02 | 7.56E-03 | 5.67E-05 |
| I | 1.93E-02 | 6.71E-03 | 1.77E-04 |
| J | 7.05E-03 | 2.32E-03 | 5.50E-05 |
| K | 1.10E-02 | 3.32E-01 | 6.34E-01 |

|   |          |          |          |
|---|----------|----------|----------|
| L | 1.69E-01 | 8.64E-02 | 4.52E-03 |
| N | 1.23E-02 | 3.00E-01 | 3.52E-01 |
| S | 6.38E-02 | 2.11E-02 | 3.47E-04 |
| T | 8.66E-02 | 3.19E-02 | 1.04E-03 |
| X | 1.03E-01 | 3.52E-02 | 1.31E-03 |
| Y | 1.73E-01 | 7.30E-02 | 2.60E-03 |

## Appendix 6.

Effect estimates for the incidence of barotraumas from multiple treatment meta-analysis compared with direct and indirect estimates, based on back-calculated, and pair-wise meta-analyses.

Direct and indirect estimates of effect and the corresponding Bayesian 'I<sup>2</sup>' for inconsistency were calculated. And the 'I<sup>2</sup>' from pooled pair-wise meta-analysis for heterogeneity were also calculated.

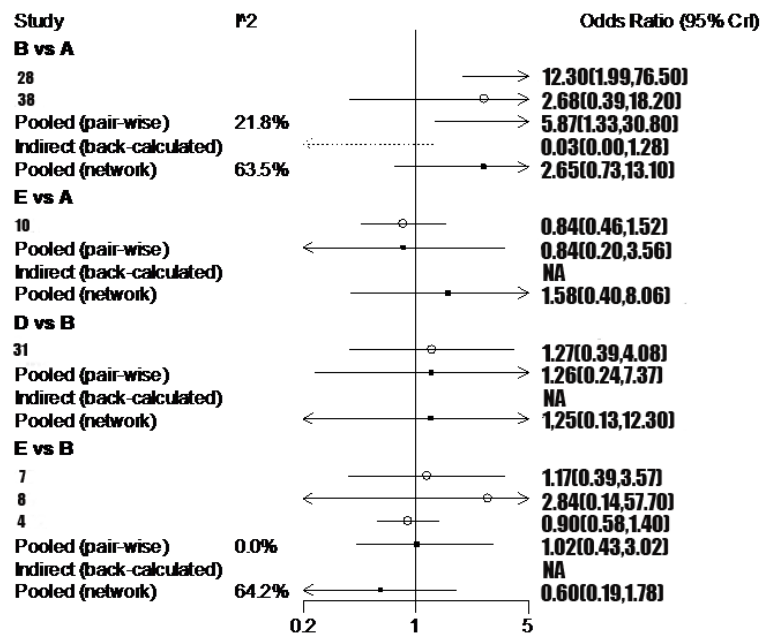

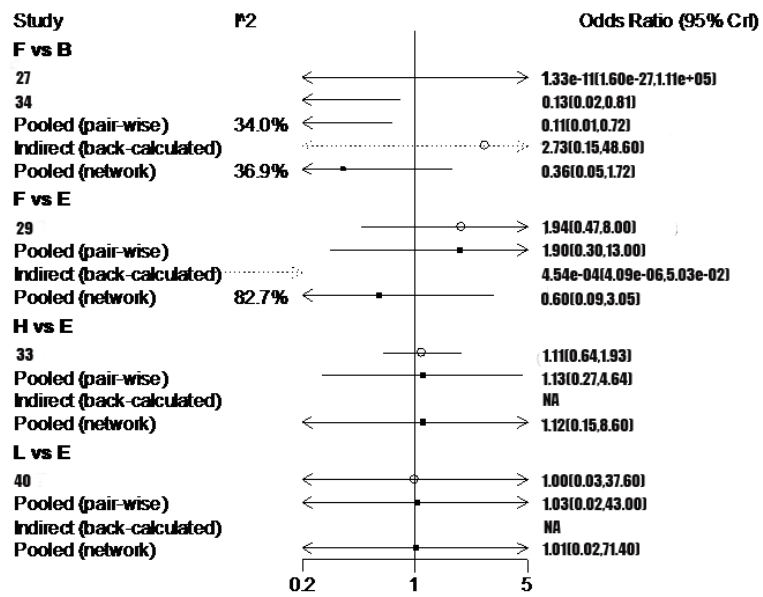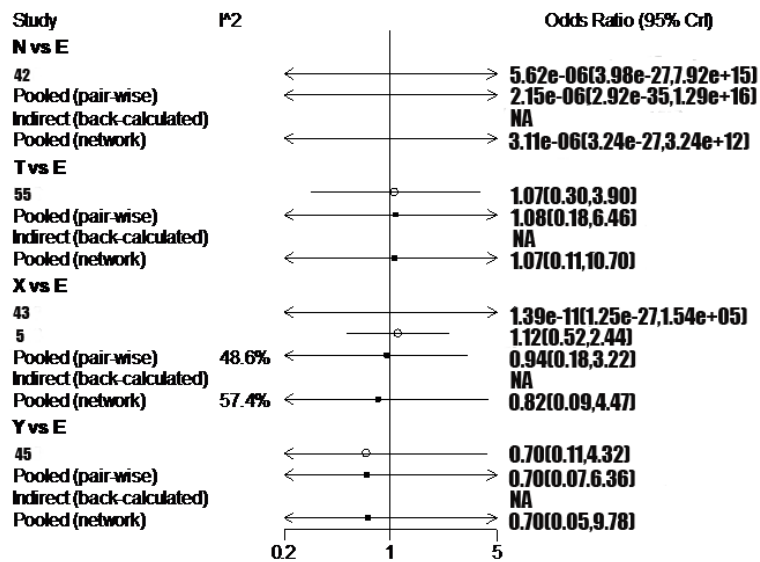

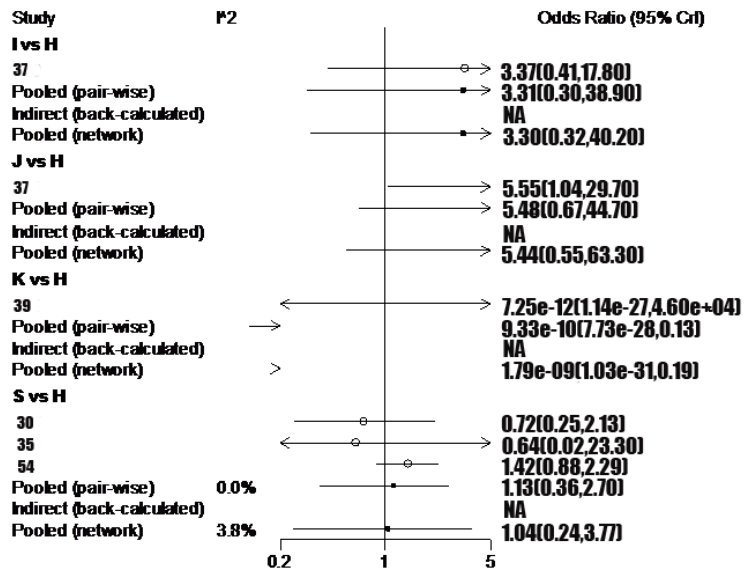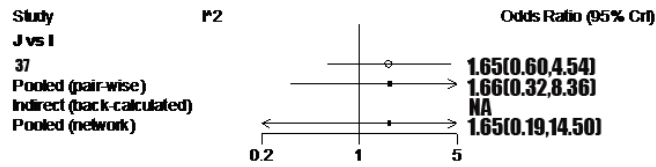

Supplement: srep22855-s1.pdf [file srep22855-s1.pdf]
